# Supplementary material for: Genome-wide association study in a Korean population identifies six novel susceptibility loci for rheumatoid arthritis
Source: PubMed Central journal article supplement — Ann Rheum Dis. 2020 Jul 28;79(11):1438–45. doi: 10.1136/annrheumdis-2020-217663 (PMC7569386; doi:10.1136/annrheumdis-2020-217663), 2020-07-28
Supplement: annrheumdis-2020-217663supp001.pdf [file annrheumdis-2020-217663supp001.pdf]

## Supplementary Information

### Genome-wide association study in a Korean population identifies six novel susceptibility loci for rheumatoid arthritis

Young-Chang Kwon,<sup>1</sup> Jiwoo Lim,<sup>2</sup> So-Young Bang,<sup>1,3</sup> Eunji Ha,<sup>2</sup> Mi Yeong Hwang,<sup>4</sup> Kyunghoon Yoon,<sup>4</sup> Jung-Yoon Choe,<sup>5</sup> Dae-Hyun Yoo,<sup>1,3</sup> Shin-Seok Lee,<sup>6</sup> Jisoo Lee,<sup>7</sup> Won Tae Chung,<sup>8</sup> Tae-Hwan Kim,<sup>1,3</sup> Yoon-Kyoung Sung,<sup>1,3</sup> Seung-Cheol Shim,<sup>9</sup> Chan-Bum Choi,<sup>1,3</sup> Jae-Bum Jun,<sup>1,3</sup> Young Mo Kang,<sup>10</sup> Jung-Min Shin,<sup>3</sup> Yeon-Kyung Lee,<sup>3</sup> Soo-Kyung Cho,<sup>1,3</sup> Bong-Jo Kim,<sup>4</sup> Hye-Soon Lee,<sup>1,3</sup> Kwangwoo Kim,<sup>2</sup> Sang-Cheol Bae<sup>1,3</sup>

#### Author affiliations

<sup>1</sup>Hanyang University Institute for Rheumatology Research, Seoul, South Korea

<sup>2</sup>Department of Biology and Department of Life and Nanopharmaceutical Sciences, Kyung Hee University, Seoul, South Korea

<sup>3</sup>Department of Rheumatology, Hanyang University Hospital for Rheumatic Diseases, Seoul, South Korea

<sup>4</sup>Division of Genome Research, Center for Genome Science, National Institute of Health, Osong Health Technology Administration Complex, Cheongju, South Korea

<sup>5</sup>Department of Rheumatology, Catholic University of Daegu School of Medicine, Daegu, South Korea

<sup>6</sup>Division of Rheumatology, Department of Internal Medicine, Chonnam National University Medical School & Hospital, Gwangju, South Korea

<sup>7</sup>Division of Rheumatology, Ewha Womans University Mokdong Hospital, Seoul, South Korea

<sup>8</sup>Department of Internal Medicine, Dong-A University Hospital, Busan, South Korea

<sup>9</sup>Division of Rheumatology, Chungnam National University Hospital, Daejeon, South Korea

<sup>10</sup>Division of Rheumatology, Department of Internal Medicine, Kyungpook National University Hospital, Daegu, South Korea

YCK, JLim, and SYB contributed equally.

**Correspondence to** Kwangwoo Kim, Department of Biology and Department of Life and Nanopharmaceutical Sciences, Kyung Hee University, Seoul, South Korea; kkim@khu.ac.kr or Sang-Cheol Bae, Department of Rheumatology, Hanyang University Hospital for Rheumatic Diseases, Seoul, South Korea; scbae@hanyang.ac.kr

Supplementary Table 1 | Genes prioritized by FUMA gene mapping

| Gene                  | Position mapping |           | eQTL mapping |                                                                                                                                                                                                                                                                                                                                                               | Chromatin interaction mapping |                |
|-----------------------|------------------|-----------|--------------|---------------------------------------------------------------------------------------------------------------------------------------------------------------------------------------------------------------------------------------------------------------------------------------------------------------------------------------------------------------|-------------------------------|----------------|
|                       | No. of SNPs      | minGwas P | No. of SNP   | Tissue                                                                                                                                                                                                                                                                                                                                                        | Mapping                       | Tissue         |
| <i>PADI3</i>          | 14               | 1.20E-07  | 0            | NA                                                                                                                                                                                                                                                                                                                                                            | No                            | NA             |
| <i>MIR3972</i>        | 11               | 1.12E-06  | 0            | NA                                                                                                                                                                                                                                                                                                                                                            | No                            | NA             |
| <i>PADI4</i>          | 180              | 4.02E-16  | 187          | T CD4 naive:T CD4 naive activated:T CD8 naive:Monocyte classical:Monocyte non classical:T CD4 naive TREG:Whole Blood:Lung:Spleen                                                                                                                                                                                                                              | Yes                           | Spleen         |
| <i>AC004824.2</i>     | 120              | 4.02E-16  | 0            | NA                                                                                                                                                                                                                                                                                                                                                            | No                            | NA             |
| <i>KCNJ10</i>         | 0                | 1.30E-09  | 0            | NA                                                                                                                                                                                                                                                                                                                                                            | Yes                           | GM12878        |
| <i>IGSF8</i>          | 0                | 1.30E-09  | 0            | NA                                                                                                                                                                                                                                                                                                                                                            | Yes                           | GM12878        |
| <i>PEA15</i>          | 0                | 1.30E-09  | 0            | NA                                                                                                                                                                                                                                                                                                                                                            | Yes                           | GM12878        |
| <i>AL121987.1</i>     | 0                | 1.30E-09  | 0            | NA                                                                                                                                                                                                                                                                                                                                                            | Yes                           | GM12878        |
| <i>RP11-574F21.2</i>  | 0                | 1.30E-09  | 0            | NA                                                                                                                                                                                                                                                                                                                                                            | Yes                           | GM12878        |
| <i>VANGL2</i>         | 1                | 7.08E-09  | 0            | NA                                                                                                                                                                                                                                                                                                                                                            | No                            | NA             |
| <i>SLAMF6</i>         | 5                | 1.30E-09  | 0            | NA                                                                                                                                                                                                                                                                                                                                                            | Yes                           | Spleen:GM12878 |
| <i>AL138930.1</i>     | 1                | 6.65E-06  | 0            | NA                                                                                                                                                                                                                                                                                                                                                            | No                            | NA             |
| <i>CD84</i>           | 0                | 1.30E-09  | 0            | NA                                                                                                                                                                                                                                                                                                                                                            | Yes                           | Spleen:GM12878 |
| <i>SLAMF1</i>         | 0                | 1.30E-09  | 0            | NA                                                                                                                                                                                                                                                                                                                                                            | Yes                           | GM12878        |
| <i>CD48</i>           | 0                | 1.30E-09  | 0            | NA                                                                                                                                                                                                                                                                                                                                                            | Yes                           | GM12878        |
| <i>SLAMF7</i>         | 0                | 1.30E-09  | 0            | NA                                                                                                                                                                                                                                                                                                                                                            | Yes                           | GM12878        |
| <i>LY9</i>            | 0                | 1.30E-09  | 0            | NA                                                                                                                                                                                                                                                                                                                                                            | Yes                           | GM12878        |
| <i>ITLN1</i>          | 0                | 1.30E-09  | 0            | NA                                                                                                                                                                                                                                                                                                                                                            | Yes                           | GM12878        |
| <i>RP11-544M22.13</i> | 0                | 1.30E-09  | 0            | NA                                                                                                                                                                                                                                                                                                                                                            | Yes                           | GM12878        |
| <i>TSTD1</i>          | 0                | 1.30E-09  | 0            | NA                                                                                                                                                                                                                                                                                                                                                            | Yes                           | GM12878        |
| <i>USF1</i>           | 0                | 1.30E-09  | 0            | NA                                                                                                                                                                                                                                                                                                                                                            | Yes                           | GM12878        |
| <i>ARHGAP30</i>       | 0                | 1.30E-09  | 0            | NA                                                                                                                                                                                                                                                                                                                                                            | Yes                           | GM12878        |
| <i>STAT1</i>          | 0                | 2.54E-12  | 0            | NA                                                                                                                                                                                                                                                                                                                                                            | Yes                           | GM12878        |
| <i>AC067945.2</i>     | 0                | 2.54E-12  | 0            | NA                                                                                                                                                                                                                                                                                                                                                            | Yes                           | GM12878        |
| <i>STAT4</i>          | 25               | 1.66E-13  | 0            | NA                                                                                                                                                                                                                                                                                                                                                            | Yes                           | GM12878        |
| <i>CXCL13</i>         | 1                | 1.86E-09  | 0            | NA                                                                                                                                                                                                                                                                                                                                                            | No                            | NA             |
| <i>RP5-1120P11.1</i>  | 0                | 2.90E-10  | 0            | NA                                                                                                                                                                                                                                                                                                                                                            | Yes                           | Spleen:GM12878 |
| <i>RP5-1120P11.3</i>  | 0                | 2.90E-10  | 0            | NA                                                                                                                                                                                                                                                                                                                                                            | Yes                           | Spleen:GM12878 |
| <i>HSP90AB1</i>       | 2                | 9.05E-10  | 0            | NA                                                                                                                                                                                                                                                                                                                                                            | No                            | NA             |
| <i>SLC35B2</i>        | 9                | 6.03E-10  | 0            | NA                                                                                                                                                                                                                                                                                                                                                            | No                            | NA             |
| <i>MIR4647</i>        | 2                | 9.05E-10  | 0            | NA                                                                                                                                                                                                                                                                                                                                                            | No                            | NA             |
| <i>NFKBIE</i>         | 14               | 2.90E-10  | 0            | NA                                                                                                                                                                                                                                                                                                                                                            | No                            | NA             |
| <i>TMEM151B</i>       | 37               | 2.90E-10  | 2            | T CD4 naive TREG                                                                                                                                                                                                                                                                                                                                              | No                            | NA             |
| <i>RP11-444E17.6</i>  | 37               | 2.90E-10  | 0            | NA                                                                                                                                                                                                                                                                                                                                                            | No                            | NA             |
| <i>TCTE1</i>          | 22               | 2.90E-10  | 2            | Small Intestine Terminal Ileum                                                                                                                                                                                                                                                                                                                                | No                            | NA             |
| <i>AARS2</i>          | 19               | 1.67E-08  | 0            | NA                                                                                                                                                                                                                                                                                                                                                            | Yes                           | Spleen         |
| <i>SPATS1</i>         | 0                | 2.93E-08  | 0            | NA                                                                                                                                                                                                                                                                                                                                                            | Yes                           | Spleen         |
| <i>IL20RA</i>         | 0                | 3.26E-07  | 0            | NA                                                                                                                                                                                                                                                                                                                                                            | Yes                           | GM12878        |
| <i>RP11-356I2.4</i>   | 34               | 3.29E-10  | 0            | NA                                                                                                                                                                                                                                                                                                                                                            | Yes                           | GM12878        |
| <i>TNFAIP3</i>        | 21               | 3.29E-10  | 0            | NA                                                                                                                                                                                                                                                                                                                                                            | Yes                           | GM12878        |
| <i>RPS6KA2</i>        | 0                | 1.36E-13  | 364          | T CD8 naive activated:Monocyte classical:NK:Whole Blood                                                                                                                                                                                                                                                                                                       | No                            | NA             |
| <i>RP11-514O12.4</i>  | 49               | 1.18E-11  | 0            | NA                                                                                                                                                                                                                                                                                                                                                            | Yes                           | GM12878        |
| <i>RPS6KA2-AS1</i>    | 0                | 2.59E-11  | 306          | T CD4 naive activated:T CD8 naive scRNA eQTLs/T CD4:scRNA eQTLs/PBMC:B cell naive:T CD4 naive:T CD4 naive activated:T CD8 naive:T CD8 naive activated:Monocyte classical:NK:T CD4 TFH:T CD4 TH1:T CD4 TH17:T CD4 TH1 17:T CD4 TH2:T CD4 memory TREG:T CD4 naive TREG:Cells EBV-transformed lymphocytes:Whole Blood:Lung:Small Intestine Terminal Ileum:Spleen | Yes                           | GM12878        |
| <i>RP1-167A14.2</i>   | 152              | 1.18E-11  | 302          | Cells EBV-transformed lymphocytes:Whole Blood                                                                                                                                                                                                                                                                                                                 | Yes                           | GM12878        |
| <i>MIR3939</i>        | 58               | 1.18E-11  | 225          | T CD4 TFH:T CD4 memory TREG                                                                                                                                                                                                                                                                                                                                   | Yes                           | GM12878        |
| <i>FGFR1OP</i>        | 187              | 1.36E-13  | 204          | Whole Blood:Lung                                                                                                                                                                                                                                                                                                                                              | Yes                           | GM12878        |
| <i>CCR6</i>           | 45               | 1.36E-13  | 166          | T CD4 TFH:T CD4 TH17:T CD4 TH1 17:Whole Blood:Spleen                                                                                                                                                                                                                                                                                                          | Yes                           | GM12878        |
| <i>GPR31</i>          | 0                | 2.03E-09  | 1            | T CD4 naive                                                                                                                                                                                                                                                                                                                                                   | No                            | NA             |
| <i>EIF4H</i>          | 1                | 6.32E-07  | 0            | NA                                                                                                                                                                                                                                                                                                                                                            | Yes                           | GM12878        |

|               |    |          |    |                                                                                                                                                                                                                                                                                       |     |                     |
|---------------|----|----------|----|---------------------------------------------------------------------------------------------------------------------------------------------------------------------------------------------------------------------------------------------------------------------------------------|-----|---------------------|
| RFC2          | 1  | NA       | 0  | NA                                                                                                                                                                                                                                                                                    | No  | NA                  |
| RNU6-1070P    | 1  | NA       | 0  | NA                                                                                                                                                                                                                                                                                    | No  | NA                  |
| GTF2IRD1      | 15 | 1.26E-20 | 0  | NA                                                                                                                                                                                                                                                                                    | No  | NA                  |
| RNA5SP233     | 1  | NA       | 0  | NA                                                                                                                                                                                                                                                                                    | No  | NA                  |
| AC004851.1    | 3  | 6.32E-07 | 0  | NA                                                                                                                                                                                                                                                                                    | No  | NA                  |
| RP5-1186P10.2 | 7  | 1.26E-20 | 0  | NA                                                                                                                                                                                                                                                                                    | No  | NA                  |
| GTF2I         | 1  | 2.45E-19 | 0  | NA                                                                                                                                                                                                                                                                                    | No  | NA                  |
| NCF1          | 2  | 1.67E-11 | 0  | NA                                                                                                                                                                                                                                                                                    | No  | NA                  |
| GTF2IRD2      | 1  | 2.24E-08 | 0  | NA                                                                                                                                                                                                                                                                                    | No  | NA                  |
| GTF2IRD2B     | 2  | NA       | 0  | NA                                                                                                                                                                                                                                                                                    | No  | NA                  |
| ARID5B        | 4  | 2.39E-12 | 0  | NA                                                                                                                                                                                                                                                                                    | Yes | Spleen:GM12878      |
| RTKN2         | 0  | 2.39E-12 | 0  | NA                                                                                                                                                                                                                                                                                    | Yes | GM12878             |
| WEE1          | 0  | 1.28E-09 | 0  | NA                                                                                                                                                                                                                                                                                    | Yes | Spleen:GM12878      |
| snoU13        | 0  | 1.28E-09 | 0  | NA                                                                                                                                                                                                                                                                                    | Yes | Spleen:GM12878      |
| SWAP70        | 31 | 4.48E-10 | 9  | Lung:Spleen                                                                                                                                                                                                                                                                           | Yes | GM12878             |
| RP11-540A21.2 | 14 | 4.48E-10 | 0  | NA                                                                                                                                                                                                                                                                                    | No  | NA                  |
| SBF2-AS1      | 31 | 4.48E-10 | 0  | NA                                                                                                                                                                                                                                                                                    | No  | NA                  |
| SBF2          | 21 | 1.51E-08 | 0  | NA                                                                                                                                                                                                                                                                                    | No  | NA                  |
| RP11-351I24.1 | 0  | 1.28E-09 | 0  | NA                                                                                                                                                                                                                                                                                    | Yes | Spleen:GM12878      |
| ADM           | 0  | 1.28E-09 | 0  | NA                                                                                                                                                                                                                                                                                    | Yes | Spleen:GM12878      |
| AMPD3         | 0  | 1.28E-09 | 0  | NA                                                                                                                                                                                                                                                                                    | Yes | Spleen:GM12878      |
| SH2B3         | 1  | 3.89E-09 | 0  | NA                                                                                                                                                                                                                                                                                    | No  | NA                  |
| ATXN2         | 1  | 3.78E-09 | 0  | NA                                                                                                                                                                                                                                                                                    | No  | NA                  |
| AC002395.1    | 1  | 3.78E-09 | 0  | NA                                                                                                                                                                                                                                                                                    | No  | NA                  |
| TMEM116       | 2  | 7.94E-08 | 0  | NA                                                                                                                                                                                                                                                                                    | No  | NA                  |
| ERP29         | 1  | 1.20E-07 | 0  | NA                                                                                                                                                                                                                                                                                    | No  | NA                  |
| NAA25         | 1  | 1.20E-07 | 0  | NA                                                                                                                                                                                                                                                                                    | No  | NA                  |
| MIR3657       | 1  | 1.20E-07 | 0  | NA                                                                                                                                                                                                                                                                                    | No  | NA                  |
| NFKBIA        | 9  | 5.28E-09 | 0  | NA                                                                                                                                                                                                                                                                                    | No  | NA                  |
| RP11-317N8.3  | 0  | 5.28E-09 | 2  | T CD4 TH17                                                                                                                                                                                                                                                                            | No  | NA                  |
| CTD-2325P2.4  | 0  | 5.23E-06 | 0  | NA                                                                                                                                                                                                                                                                                    | Yes | Lung:Spleen:GM12878 |
| ZFP36L1       | 0  | 5.23E-06 | 0  | NA                                                                                                                                                                                                                                                                                    | Yes | GM12878             |
| LINC00638     | 0  | 3.76E-15 | 9  | Cells EBV-transformed lymphocytes:Whole Blood:Lung:Spleen                                                                                                                                                                                                                             | No  | NA                  |
| CTD-3051D23.1 | 0  | 8.80E-09 | 1  | Whole Blood                                                                                                                                                                                                                                                                           | No  | NA                  |
| CEP170B       | 0  | 8.80E-09 | 1  | Whole Blood                                                                                                                                                                                                                                                                           | No  | NA                  |
| CTD-3051D23.3 | 0  | 1.52E-12 | 0  | NA                                                                                                                                                                                                                                                                                    | Yes | Spleen              |
| PLD4          | 44 | 2.36E-16 | 49 | Whole Blood:Spleen                                                                                                                                                                                                                                                                    | Yes | Spleen              |
| AHNAK2        | 68 | 2.36E-16 | 40 | Lung                                                                                                                                                                                                                                                                                  | No  | NA                  |
| C14orf79      | 0  | 2.36E-16 | 51 | Lung                                                                                                                                                                                                                                                                                  | No  | NA                  |
| GPR132        | 0  | 1.26E-10 | 1  | Lung                                                                                                                                                                                                                                                                                  | No  | NA                  |
| FAM98B        | 0  | 6.66E-10 | 0  | NA                                                                                                                                                                                                                                                                                    | Yes | GM12878             |
| RASGRP1       | 10 | 6.66E-10 | 8  | B cell naive:Cells EBV-transformed lymphocytes:Spleen                                                                                                                                                                                                                                 | Yes | GM12878             |
| RP11-275I4.1  | 3  | 9.50E-10 | 0  | NA                                                                                                                                                                                                                                                                                    | No  | NA                  |
| LINC00158     | 9  | 6.36E-09 | 0  | NA                                                                                                                                                                                                                                                                                    | No  | NA                  |
| MIR155HG      | 0  | 9.88E-08 | 0  | NA                                                                                                                                                                                                                                                                                    | Yes | GM12878             |
| MRPL39        | 0  | 9.88E-08 | 0  | NA                                                                                                                                                                                                                                                                                    | Yes | GM12878             |
| JAM2          | 0  | 9.88E-08 | 0  | NA                                                                                                                                                                                                                                                                                    | Yes | GM12878             |
| ATP5J         | 0  | 9.88E-08 | 0  | NA                                                                                                                                                                                                                                                                                    | Yes | GM12878             |
| GABPA         | 0  | 9.88E-08 | 0  | NA                                                                                                                                                                                                                                                                                    | Yes | GM12878             |
| APP           | 0  | 9.88E-08 | 0  | NA                                                                                                                                                                                                                                                                                    | Yes | GM12878             |
| AP000230.1    | 0  | 9.88E-08 | 0  | NA                                                                                                                                                                                                                                                                                    | Yes | GM12878             |
| RP3-508I15.21 | 0  | 1.83E-08 | 1  | T CD4 TH17                                                                                                                                                                                                                                                                            | No  | NA                  |
| APOBEC3D      | 0  | 9.16E-06 | 1  | T CD4 TH17                                                                                                                                                                                                                                                                            | No  | NA                  |
| RPL3          | 7  | 6.80E-08 | 1  | Lung                                                                                                                                                                                                                                                                                  | No  | NA                  |
| SNORD83B      | 3  | 1.37E-04 | 0  | NA                                                                                                                                                                                                                                                                                    | No  | NA                  |
| SNORD83A      | 3  | 1.37E-04 | 0  | NA                                                                                                                                                                                                                                                                                    | No  | NA                  |
| SNORD43       | 6  | 1.37E-04 | 0  | NA                                                                                                                                                                                                                                                                                    | No  | NA                  |
| SYNGR1        | 18 | 4.12E-09 | 32 | scRNA eQTLs/NK:scRNA eQTLs/PBMC:T CD4 naive:T CD8 naive:T CD8 naive activated:Monocyte classical:NK:T CD4 TFH:T CD4 TH1:T CD4 TH17:T CD4 TH1 17:T CD4 TH2:T CD4 memory TREG:T CD4 naive TREG:Cells EBV-transformed lymphocytes:Whole Blood:Lung:Small Intestine Terminal Ileum:Spleen | No  | NA                  |
| TAB1          | 8  | 1.27E-08 | 0  | NA                                                                                                                                                                                                                                                                                    | Yes | Spleen:GM12878      |
| MGAT3         | 0  | 1.27E-08 | 3  | B cell naive:Whole Blood                                                                                                                                                                                                                                                              | Yes | GM12878             |

|                  |    |          |    |                                                                                                  |     |                |
|------------------|----|----------|----|--------------------------------------------------------------------------------------------------|-----|----------------|
| <i>ATF4</i>      | 0  | 1.27E-08 | 0  | NA                                                                                               | Yes | Spleen:GM12878 |
| <i>FAM58A</i>    | 0  | 4.89E-10 | 5  | T CD4 TH2                                                                                        | No  | NA             |
| <i>PDZD4</i>     | 0  | 4.89E-10 | 39 | T CD4 naive:T CD4 naive activated:Whole Blood                                                    | No  | NA             |
| <i>RENBP</i>     | 2  | 1.33E-06 | 0  | NA                                                                                               | No  | NA             |
| <i>HCFC1</i>     | 3  | 1.32E-06 | 0  | NA                                                                                               | No  | NA             |
| <i>TMEM187</i>   | 4  | 4.89E-10 | 44 | Monocyte classical:Monocyte non classical:Whole Blood:Lung:Small Intestine Terminal Ileum:Spleen | No  | NA             |
| <i>MIR3202-1</i> | 4  | 7.23E-07 | 0  | NA                                                                                               | No  | NA             |
| <i>IRAK1</i>     | 16 | 4.89E-10 | 0  | NA                                                                                               | Yes | Spleen         |
| <i>MIR718</i>    | 11 | 4.89E-10 | 0  | NA                                                                                               | Yes | Spleen         |
| <i>MECP2</i>     | 40 | 4.89E-10 | 18 | Lung                                                                                             | Yes | GM12878        |
| <i>PLXNA3</i>    | 0  | 7.19E-10 | 17 | Whole Blood:Lung                                                                                 | No  | NA             |
| <i>FAM3A</i>     | 0  | 5.31E-10 | 14 | Lung                                                                                             | No  | NA             |

minGwasP, minimum Meta-GWAS *P* value of SNP(s) used in prioritizing the gene; Tissues, tissues with significant eQTL associations or chromatin interactions; NA, not available.

**Supplementary Table 2 | MAGMA gene set analysis results**

| Gene set                                                       | Number of genes | Beta  | Standardized beta | Standard error | P value* |
|----------------------------------------------------------------|-----------------|-------|-------------------|----------------|----------|
| CD40 signaling (up) <sup>†</sup>                               | 91              | 0.699 | 0.047             | 0.092          | 1.62E-14 |
| Histone citrullination <sup>‡</sup>                            | 4               | 3.946 | 0.056             | 0.559          | 8.60E-13 |
| Protein arginine deiminase activity <sup>‡</sup>               | 4               | 3.946 | 0.056             | 0.559          | 8.60E-13 |
| IL21 mediated signaling pathway <sup>‡</sup>                   | 8               | 1.696 | 0.034             | 0.293          | 3.66E-09 |
| IL21 signaling <sup>‡</sup>                                    | 10              | 1.698 | 0.038             | 0.294          | 3.72E-09 |
| Lymphocyte activation <sup>‡</sup>                             | 630             | 0.188 | 0.033             | 0.035          | 4.53E-08 |
| B cell activation <sup>‡</sup>                                 | 236             | 0.289 | 0.031             | 0.056          | 1.56E-07 |
| Lymphocyte differentiation <sup>‡</sup>                        | 340             | 0.244 | 0.032             | 0.048          | 1.86E-07 |
| T cell differentiation <sup>‡</sup>                            | 229             | 0.296 | 0.032             | 0.059          | 3.21E-07 |
| CD40 pathway <sup>‡</sup>                                      | 29              | 0.734 | 0.028             | 0.148          | 3.70E-07 |
| PKC pathway <sup>‡</sup>                                       | 7               | 1.656 | 0.031             | 0.336          | 4.10E-07 |
| Plasmacytoma (up) <sup>‡</sup>                                 | 245             | 0.267 | 0.03              | 0.055          | 6.41E-07 |
| Regulation of mast cell chemotaxis <sup>‡</sup>                | 7               | 1.782 | 0.033             | 0.368          | 6.69E-07 |
| Positive regulation of interferon gamma secretion <sup>‡</sup> | 8               | 1.831 | 0.037             | 0.382          | 8.43E-07 |
| Leukocyte cell-cell adhesion <sup>‡</sup>                      | 310             | 0.238 | 0.029             | 0.051          | 1.54E-06 |
| ESR1 targets not via AKT1 (down) <sup>‡</sup>                  | 89              | 0.461 | 0.031             | 0.1            | 1.79E-06 |
| Negative regulation of lipid localization <sup>‡</sup>         | 40              | 0.699 | 0.031             | 0.152          | 2.00E-06 |
| alpha beta T cell activation <sup>‡</sup>                      | 131             | 0.359 | 0.029             | 0.078          | 2.12E-06 |
| Cancer copy number (up) <sup>‡</sup>                           | 320             | 0.226 | 0.028             | 0.049          | 2.26E-06 |
| Positive regulation of cell activation <sup>‡</sup>            | 307             | 0.228 | 0.028             | 0.05           | 2.90E-06 |

\*The Bonferroni-corrected significance threshold was defined at 0.05/15481.

<sup>†</sup>Curated gene sets

<sup>‡</sup>Gene ontology terms

Supplementary Table 3 | Genetic associations in RA loci in Korean and European populations

| Gene                  | Variant        | Chr | Position* | EA/NEA | Frequency <sup>‡</sup> |                    | This study               |          | Europeans                |          | <i>P</i> <sub>het</sub> <sup>§</sup> |
|-----------------------|----------------|-----|-----------|--------|------------------------|--------------------|--------------------------|----------|--------------------------|----------|--------------------------------------|
|                       |                |     |           |        | KOR                    | EUR                | OR (95% CI) <sup>‡</sup> | <i>P</i> | OR (95% CI) <sup>‡</sup> | <i>P</i> |                                      |
| <b>Known variants</b> |                |     |           |        |                        |                    |                          |          |                          |          |                                      |
| <i>PADI4</i>          | rs2301888      | 1   | 17672730  | A/G    | 0.584                  | 0.345              | 0.82 (0.78–0.86)         | 2.2E-15  | 0.90 (0.87–0.93)         | 5.5E-09  | 1.5E-03                              |
| <i>STAT4</i>          | rs11889341     | 2   | 191943742 | T/C    | 0.303                  | 0.235              | 1.22 (1.15–1.28)         | 2.9E-13  | 1.12 (1.09–1.16)         | 1.4E-12  | 8.1E-03                              |
| <i>PLD4-AHNAK2</i>    | rs2582532      | 14  | 105392837 | T/C    | 0.291                  | 0.010              | 0.81 (0.77–0.86)         | 4.5E-13  | 1.08 (0.83–1.39)         | 5.9E-01  | 4.0E-02                              |
| <i>CCR6</i>           | rs1571878      | 6   | 167540842 | T/C    | 0.554                  | 0.552              | 0.83 (0.79–0.88)         | 6.8E-13  | 0.88 (0.86–0.91)         | 2.4E-18  | 4.8E-02                              |
| <i>ARID5B</i>         | rs71508903     | 10  | 63779871  | T/C    | 0.217                  | 0.213              | 1.24 (1.17–1.32)         | 2.4E-12  | 1.15 (1.11–1.20)         | 3.3E-15  | 3.8E-02                              |
| <i>TNFAIP3</i>        | rs17264332     | 6   | 138005515 | G/A    | 0.000 <sup>¶</sup>     | 0.218              | NA                       | NA       | 1.17 (1.13–1.21)         | 4.1E-20  | NA                                   |
|                       | rs7752903      | 6   | 138227364 | T/G    | 0.942                  | 0.967              | 0.74 (0.67–0.81)         | 3.0E-10  | 0.71 (0.66–0.76)         | 1.7E-20  | 5.2E-01                              |
| <i>NFKBIE</i>         | rs2233424      | 6   | 44233921  | T/C    | 0.215                  | 0.043              | 1.20 (1.13–1.27)         | 6.0E-10  | 1.33 (1.20–1.47)         | 3.3E-08  | 7.5E-02                              |
| <i>RASGRP1</i>        | rs8032939      | 15  | 38834033  | T/C    | 0.408                  | 0.742              | 0.86 (0.81–0.90)         | 9.5E-10  | 0.88 (0.85–0.92)         | 3.2E-14  | 2.7E-01                              |
| <i>IRAK1</i>          | rs5987194      | X   | 153301467 | C/G    | 0.745                  | 0.136              | 1.19 (1.13–1.26)         | 1.0E-09  | 1.16 (1.12–1.21)         | 2.8E-12  | 4.6E-01                              |
| <i>SYNGR1</i>         | rs909685       | 22  | 39747671  | A/T    | 0.847                  | 0.305              | 1.23 (1.14–1.32)         | 5.3E-08  | 1.11 (1.08–1.15)         | 6.4E-12  | 1.5E-02                              |
| <i>UBE2L3-YDJC</i>    | rs11089637     | 22  | 21979096  | T/C    | 0.579                  | 0.837              | 0.88 (0.84–0.92)         | 3.7E-07  | 0.91 (0.87–0.95)         | 2.0E-07  | 3.3E-01                              |
| <i>BLK</i>            | rs2736337      | 8   | 11341880  | T/C    | 0.277                  | 0.747              | 0.86 (0.81–0.91)         | 3.9E-07  | 0.92 (0.89–0.95)         | 7.6E-08  | 6.5E-02                              |
| <i>RAD51B</i>         | rs1950897      | 14  | 68760141  | T/C    | 0.852                  | 0.715              | 1.20 (1.12–1.29)         | 8.3E-07  | 1.09 (1.06–1.12)         | 5.0E-08  | 1.5E-02                              |
| <i>CLNK</i>           | rs13142500     | 4   | 10727357  | T/C    | 0.423                  | 0.545              | 0.88 (0.84–0.93)         | 1.5E-06  | 0.91 (0.87–0.95)         | 2.4E-06  | 4.1E-01                              |
| <i>UBASH3A</i>        | rs1893592      | 21  | 43855067  | A/C    | 0.754                  | 0.722              | 1.15 (1.08–1.22)         | 2.4E-06  | 1.11 (1.07–1.15)         | 9.8E-09  | 3.1E-01                              |
| <i>COG6</i>           | rs9603616      | 13  | 40368069  | T/C    | 0.254                  | 0.335              | 0.87 (0.82–0.92)         | 3.3E-06  | 0.90 (0.87–0.93)         | 2.8E-11  | 3.3E-01                              |
| <i>RTKN2</i>          | rs6479800      | 10  | 64036881  | C/G    | 0.077                  | 0.233              | 1.22 (1.12–1.33)         | 1.1E-05  | 1.08 (1.04–1.13)         | 1.4E-04  | 1.5E-02                              |
| <i>AFF3</i>           | rs9653442      | 2   | 100825367 | T/C    | 0.567                  | 0.532              | 0.90 (0.85–0.94)         | 1.2E-05  | 0.89 (0.87–0.92)         | 9.8E-15  | 8.8E-01                              |
| <i>CTLA4</i>          | rs3087243      | 2   | 204738919 | A/G    | 0.167                  | 0.440              | 0.86 (0.80–0.92)         | 1.2E-05  | 0.87 (0.85–0.89)         | 3.6E-22  | 7.7E-01                              |
| <i>ANKRD55</i>        | rs7731626      | 5   | 55444683  | A/G    | 0.089                  | 0.359              | 0.81 (0.74–0.89)         | 1.2E-05  | 0.83 (0.80–0.86)         | 8.2E-23  | 7.1E-01                              |
| <i>WDFY4</i>          | rs2671692      | 10  | 50097819  | A/G    | 0.329                  | 0.635              | 1.12 (1.06–1.18)         | 1.7E-05  | 1.06 (1.03–1.09)         | 2.6E-05  | 6.4E-02                              |
| <i>IL6R</i>           | rs2228145      | 1   | 154426970 | A/C    | 0.567                  | 0.605              | 1.11 (1.06–1.17)         | 1.8E-05  | 1.07 (1.04–1.10)         | 4.8E-06  | 1.6E-01                              |
| <i>P2RY10</i>         | chrX:78464616  | X   | 78464616  | A/C    | 0.463                  | 0.010              | 1.10 (1.05–1.15)         | 9.3E-05  | 1.16 (0.77–1.74)         | 4.6E-01  | 8.0E-01                              |
| <i>EOMES</i>          | rs3806624      | 3   | 27764623  | A/G    | 0.185                  | 0.537              | 0.88 (0.83–0.94)         | 1.7E-04  | 0.93 (0.90–0.96)         | 2.8E-08  | 2.0E-01                              |
| <i>GATA3</i>          | rs3824660      | 10  | 8104722   | T/C    | 0.614                  | 0.605              | 0.91 (0.86–0.96)         | 1.8E-04  | 0.91 (0.88–0.94)         | 2.7E-09  | 9.9E-01                              |
| <i>ETS1</i>           | rs73013527     | 11  | 128496952 | T/C    | 0.276                  | 0.497              | 0.90 (0.85–0.95)         | 2.5E-04  | 0.93 (0.90–0.95)         | 1.0E-06  | 3.5E-01                              |
| <i>LBH</i>            | rs10175798     | 2   | 30449594  | A/G    | 0.375                  | 0.625              | 1.10 (1.04–1.15)         | 3.1E-04  | 1.09 (1.06–1.12)         | 4.2E-08  | 8.4E-01                              |
| <i>CD83</i>           | chr6:14103212  | 6   | 14103212  | T/C    | 0.151                  | 0.053              | 1.13 (1.05–1.20)         | 4.2E-04  | 1.10 (1.02–1.18)         | 1.3E-02  | 6.4E-01                              |
| <i>SPRED2</i>         | rs1858037      | 2   | 65598300  | A/T    | 0.811                  | 0.342              | 0.90 (0.84–0.95)         | 4.3E-04  | 0.92 (0.89–0.95)         | 2.0E-09  | 5.1E-01                              |
| <i>ETV7</i>           | rs2234067      | 6   | 36355654  | A/C    | 0.038                  | 0.128              | 0.78 (0.68–0.90)         | 5.0E-04  | 0.88 (0.84–0.92)         | 4.1E-08  | 1.1E-01                              |
| <i>CD40</i>           | rs4239702      | 20  | 44749251  | T/C    | 0.345                  | 0.272              | 0.91 (0.87–0.96)         | 5.9E-04  | 0.88 (0.85–0.90)         | 1.1E-16  | 2.1E-01                              |
| <i>IRF5</i>           | chr7:128580042 | 7   | 128580042 | A/G    | 0.771                  | 0.535              | 0.91 (0.86–0.96)         | 8.3E-04  | 0.89 (0.87–0.92)         | 4.1E-12  | 6.1E-01                              |
| <i>PTPN2</i>          | rs8083786      | 18  | 12881361  | A/G    | 0.667                  | 0.837              | 0.92 (0.87–0.97)         | 9.5E-04  | 0.89 (0.86–0.93)         | 8.4E-09  | 3.9E-01                              |
| <i>TXNDC11</i>        | rs4780401      | 16  | 11839326  | T/G    | 0.474                  | 0.593              | 1.09 (1.03–1.15)         | 9.8E-04  | 1.09 (1.06–1.13)         | 8.7E-09  | 9.7E-01                              |
| <i>ARAP1</i>          | rs11605042     | 11  | 72411664  | A/G    | 0.397                  | 0.488              | 0.92 (0.88–0.97)         | 1.4E-03  | 0.95 (0.92–0.99)         | 1.4E-02  | 3.0E-01                              |
| <i>FCGR2B</i>         | chr1:161644258 | 1   | 161644258 | C/G    | 0.238                  | 0.000 <sup>¶</sup> | 1.11 (1.04–1.18)         | 1.5E-03  | NA                       | NA       | NA                                   |
| <i>CEP57</i>          | rs4409785      | 11  | 95311422  | T/C    | 0.925                  | 0.825              | 0.87 (0.80–0.95)         | 2.0E-03  | 0.89 (0.86–0.93)         | 3.6E-09  | 6.0E-01                              |
| <i>FCGR2A</i>         | rs72717009     | 1   | 161405053 | T/C    | 0.031                  | 0.120              | 0.79 (0.68–0.92)         | 2.9E-03  | 1.12 (1.07–1.18)         | 5.2E-07  | 2.6E-05                              |
| <i>MED1</i>           | rs1877030      | 17  | 37740161  | T/C    | 0.248                  | 0.157              | 0.92 (0.87–0.97)         | 3.4E-03  | 0.92 (0.88–0.95)         | 1.3E-05  | 1.0E+00                              |
| <i>CDK6</i>           | rs4272         | 7   | 92236829  | A/G    | 0.894                  | 0.785              | 0.89 (0.82–0.96)         | 3.6E-03  | 0.91 (0.88–0.94)         | 1.2E-08  | 6.2E-01                              |
| <i>PRKCH</i>          | rs3783782      | 14  | 61940675  | A/G    | 0.228                  | 0.010              | 1.09 (1.03–1.15)         | 4.9E-03  | 1.12 (0.96–1.31)         | 1.4E-01  | 7.2E-01                              |
| <i>TNFRSF14-MMEL1</i> | chr1:2523811   | 1   | 2523811   | A/G    | 0.459                  | 0.295              | 0.94 (0.89–0.98)         | 7.9E-03  | 0.91 (0.88–0.94)         | 4.8E-09  | 3.3E-01                              |
| <i>FCRL3</i>          | rs2317230      | 1   | 157674997 | T/G    | 0.395                  | 0.433              | 1.07 (1.02–1.12)         | 8.1E-03  | 1.06 (1.03–1.09)         | 1.9E-04  | 7.6E-01                              |

|                    |                        |    |           |     |                    |                    |                  |         |                  |          |         |
|--------------------|------------------------|----|-----------|-----|--------------------|--------------------|------------------|---------|------------------|----------|---------|
| IL3-CSF2           | rs657075               | 5  | 131430118 | A/G | 0.283              | 0.100              | 1.08 (1.02–1.13) | 8.1E-03 | 1.07 (1.02–1.13) | 1.1E-02  | 9.0E-01 |
| IKZF3-CSF3         | chr17:38031857         | 17 | 38031857  | T/G | 0.726              | 0.537              | 0.93 (0.88–0.98) | 8.2E-03 | 0.92 (0.89–0.94) | 6.0E-10  | 6.7E-01 |
| RUNX1-LOC100506403 | rs8133843              | 21 | 36738242  | A/G | 0.535              | 0.625              | 1.07 (1.02–1.12) | 1.1E-02 | 1.09 (1.06–1.12) | 2.0E-08  | 4.5E-01 |
| ZNF438             | rs793108               | 10 | 31415106  | T/C | 0.473              | 0.505              | 1.06 (1.01–1.12) | 1.2E-02 | 1.07 (1.04–1.10) | 6.1E-07  | 8.5E-01 |
| ACOXL              | rs6732565              | 2  | 111607832 | A/G | 0.597              | 0.625              | 1.07 (1.01–1.12) | 1.3E-02 | 1.10 (1.07–1.14) | 9.4E-09  | 3.0E-01 |
| CD28               | rs1980422              | 2  | 204610396 | T/C | 0.916              | 0.757              | 0.90 (0.82–0.98) | 1.3E-02 | 0.88 (0.85–0.92) | 1.9E-13  | 7.6E-01 |
| CDK2               | rs773125               | 12 | 56394954  | A/G | 0.788              | 0.605              | 1.08 (1.02–1.15) | 1.3E-02 | 1.09 (1.06–1.12) | 2.1E-08  | 7.9E-01 |
| CD226              | rs2469434              | 18 | 67544046  | T/C | 0.604              | 0.587              | 0.94 (0.89–0.99) | 1.7E-02 | 0.95 (0.93–0.98) | 6.7E-04  | 6.8E-01 |
| IRF8               | rs13330176             | 16 | 86019087  | A/T | 0.396              | 0.235              | 1.07 (1.01–1.13) | 1.7E-02 | 1.12 (1.08–1.17) | 9.0E-09  | 1.5E-01 |
| MTF1-INPP5B        | rs28411352             | 1  | 38278579  | T/C | 0.243              | 0.258              | 1.07 (1.01–1.13) | 2.1E-02 | 1.10 (1.07–1.14) | 5.9E-09  | 3.8E-01 |
| TAGAP              | rs2451258              | 6  | 159506600 | T/C | 0.961              | 0.648              | 1.16 (1.02–1.33) | 2.4E-02 | 1.10 (1.07–1.13) | 1.6E-10  | 4.1E-01 |
| CCL19-CCL21        | rs11574914             | 9  | 347110338 | A/G | 0.060              | 0.338              | 1.12 (1.01–1.24) | 2.5E-02 | 1.13 (1.10–1.17) | 1.8E-15  | 8.7E-01 |
| ATG5               | rs9372120              | 6  | 106667535 | T/G | 0.963              | 0.795              | 0.87 (0.77–0.98) | 2.6E-02 | 0.91 (0.88–0.94) | 3.8E-08  | 5.0E-01 |
| PPIL4              | rs9373594              | 6  | 149834574 | T/C | 0.401 <sup>¶</sup> | 0.850              | NA               | NA      | 1.07 (1.02–1.12) | 6.5E-03  | NA      |
|                    | rs1474640 <sup>†</sup> | 6  | 149813940 | C/G | 0.296              | 0.843 <sup>¶</sup> | 1.06 (1.01–1.12) | 2.6E-02 | 1.08 (1.02–1.13) | 1.1E-02  | 7.4E-01 |
| IFNGR2             | rs73194058             | 21 | 34764288  | A/C | 0.510              | 0.125              | 0.95 (0.90–0.99) | 2.9E-02 | 0.88 (0.85–0.93) | 2.6E-08  | 4.6E-02 |
| IL2RA              | rs706778               | 10 | 6098949   | T/C | 0.608              | 0.408              | 1.06 (1.00–1.11) | 3.3E-02 | 1.12 (1.09–1.15) | 4.6E-15  | 4.2E-02 |
| C5orf30            | rs2561477              | 5  | 102608924 | A/G | 0.256              | 0.315              | 0.94 (0.89–1.00) | 3.9E-02 | 0.90 (0.88–0.93) | 2.2E-11  | 1.6E-01 |
| C1QBP              | rs72634030             | 17 | 5272580   | A/C | 0.649              | 0.070              | 1.06 (1.00–1.11) | 4.1E-02 | 1.12 (1.06–1.19) | 2.9E-05  | 1.4E-01 |
| TRAF1-C5           | rs10985070             | 9  | 123636121 | A/C | 0.492              | 0.575              | 0.95 (0.91–1.00) | 4.5E-02 | 0.92 (0.89–0.94) | 4.2E-09  | 2.1E-01 |
| ANXA3              | rs10028001             | 4  | 79502972  | A/T | 0.589              | 0.628              | 0.95 (0.91–1.00) | 5.8E-02 | 0.98 (0.94–1.02) | 2.7E-01  | 3.8E-01 |
| LOC145837          | rs8026898              | 15 | 69991417  | A/G | 0.074              | 0.275              | 1.09 (1.00–1.19) | 6.4E-02 | 1.15 (1.12–1.19) | 5.9E-18  | 2.7E-01 |
| TNFRSF9            | rs227163               | 1  | 7961206   | T/C | 0.691              | 0.580              | 0.95 (0.90–1.00) | 6.7E-02 | 1.00 (0.97–1.03) | 9.3E-01  | 1.1E-01 |
| CXCR5              | rs10790268             | 11 | 118729391 | A/G | 0.125              | 0.205              | 0.93 (0.86–1.01) | 7.0E-02 | 0.85 (0.82–0.89) | 1.4E-17  | 4.5E-02 |
| PLCL2              | rs4452313              | 3  | 17047032  | A/T | 0.459              | 0.705              | 0.96 (0.91–1.00) | 7.5E-02 | 0.90 (0.87–0.93) | 5.2E-11  | 4.5E-02 |
| IRF4               | rs9378815              | 6  | 426155    | C/G | 0.334              | 0.663              | 1.04 (0.99–1.10) | 1.2E-01 | 1.09 (1.06–1.13) | 1.4E-07  | 2.0E-01 |
| SFTPD              | rs726288               | 10 | 81706973  | T/C | 0.212              | 0.030              | 1.04 (0.98–1.11) | 1.5E-01 | 0.96 (0.86–1.07) | 4.1E-01  | 1.7E-01 |
| PVT1               | rs1516971              | 8  | 129542100 | T/C | 0.963              | 0.873              | 1.09 (0.96–1.24) | 2.0E-01 | 1.16 (1.11–1.21) | 3.2E-11  | 3.8E-01 |
| B3GNT2             | rs13385025             | 2  | 62461120  | A/G | 0.202              | 0.122              | 1.03 (0.97–1.10) | 3.1E-01 | 1.08 (1.02–1.15) | 1.0E-02  | 3.0E-01 |
| LOC339442          | rs12140275             | 1  | 38633879  | A/T | 0.989              | 0.755              | 1.13 (0.88–1.46) | 3.4E-01 | 1.11 (1.08–1.15) | 4.4E-09  | 8.8E-01 |
| PRKCQ              | rs947474               | 10 | 6390450   | A/G | 0.908              | 0.815              | 1.04 (0.95–1.13) | 4.1E-01 | 1.12 (1.08–1.16) | 3.3E-10  | 9.8E-02 |
| REL                | rs34695944             | 2  | 61124850  | T/C | 0.978              | 0.632              | 1.06 (0.90–1.26) | 4.8E-01 | 0.88 (0.86–0.91) | 3.7E-16  | 3.8E-02 |
| TPD52              | rs998731               | 8  | 81095395  | T/C | 0.804              | 0.443              | 1.02 (0.96–1.09) | 4.9E-01 | 1.09 (1.06–1.12) | 6.6E-09  | 6.6E-02 |
| LOC100506023       | rs2105325              | 1  | 173349725 | A/C | 0.073              | 0.252              | 0.97 (0.88–1.07) | 5.5E-01 | 0.89 (0.87–0.92) | 3.3E-11  | 1.0E-01 |
| RCAN1              | chr21:35928240         | 21 | 35928240  | T/C | 0.020              | 0.117              | 0.95 (0.79–1.14) | 5.8E-01 | 0.89 (0.85–0.93) | 7.1E-07  | 5.1E-01 |
| GRHL2              | rs678347               | 8  | 102463602 | A/G | 0.199              | 0.725              | 0.99 (0.93–1.05) | 6.3E-01 | 0.91 (0.88–0.94) | 7.3E-09  | 2.4E-02 |
| CDK4               | rs1633360              | 12 | 58108052  | T/C | 0.271              | 0.585              | 1.01 (0.96–1.07) | 6.9E-01 | 1.08 (1.05–1.11) | 7.1E-08  | 3.6E-02 |
| JAZF1              | rs67250450             | 7  | 28174986  | T/C | 0.016              | 0.793              | 1.03 (0.85–1.25) | 7.5E-01 | 1.11 (1.08–1.15) | 2.6E-09  | 4.5E-01 |
| TEC                | rs2664035              | 4  | 48220839  | A/G | 0.266              | 0.405              | 1.01 (0.95–1.07) | 7.9E-01 | 1.08 (1.05–1.11) | 3.3E-08  | 3.0E-02 |
| LY9-CD244          | rs4656942              | 1  | 160831048 | A/G | 0.308              | 0.230              | 0.99 (0.94–1.05) | 8.1E-01 | 0.99 (0.96–1.02) | 4.8E-01  | 9.2E-01 |
| CD2                | rs624988               | 1  | 117263790 | T/C | 0.463              | 0.405              | 0.99 (0.95–1.04) | 8.2E-01 | 1.09 (1.06–1.12) | 8.0E-10  | 1.3E-03 |
| ICOSLG-AIRE        | rs2236668              | 21 | 45650009  | T/C | 0.836              | 0.285              | 1.00 (0.93–1.07) | 9.0E-01 | 0.93 (0.90–0.97) | 4.6E-05  | 1.1E-01 |
| IL2RB              | rs3218251              | 22 | 37545505  | A/T | 0.080              | 0.273              | 1.01 (0.92–1.10) | 9.1E-01 | 1.08 (1.05–1.12) | 5.7E-06  | 1.5E-01 |
| TRAF6-RAG1/2       | rs331463               | 11 | 36501787  | A/T | 0.064              | 0.147              | 1.00 (0.90–1.10) | 9.9E-01 | 0.89 (0.86–0.93) | 1.1E-07  | 4.0E-02 |
| C4orf52            | rs11933540             | 4  | 26120001  | T/C | 0.993              | 0.683              | 0.73 (0.52–1.04) | 7.9E-02 | 0.87 (0.84–0.90) | 9.5E-17  | 3.4E-01 |
| SH2B3-PTPN11       | rs10774624             | 12 | 111833788 | A/G | 0.994              | 0.497              | 0.89 (0.55–1.45) | 6.4E-01 | 0.92 (0.89–0.95) | 6.9E-09  | 9.0E-01 |
| PTPN22             | rs2476601              | 1  | 114377568 | A/G | 0.000 <sup>¶</sup> | 0.108              | NA               | NA      | 1.80 (1.73–1.88) | 8.9E-170 | NA      |
| IL2-IL21           | rs45475795             | 4  | 123399491 | G/A | 0.000 <sup>¶</sup> | 0.072              | NA               | NA      | 1.14 (1.08–1.20) | 3.5E-06  | NA      |
| 10p14              | rs12413578             | 10 | 9049253   | C/T | 0.970 <sup>¶</sup> | 0.902              | NA               | NA      | 1.20 (1.12–1.29) | 7.5E-08  | NA      |

|                           |                 |    |           |     |                    |                    |                  |         |                  |         |         |
|---------------------------|-----------------|----|-----------|-----|--------------------|--------------------|------------------|---------|------------------|---------|---------|
| <i>PTPRC</i>              | rs17668708      | 1  | 198640488 | C/T | 1.000 <sup>¶</sup> | 0.895              | NA               | NA      | 1.12 (1.06–1.18) | 1.8E-05 | NA      |
| <i>CFLAR-CASP8</i>        | rs6715284       | 2  | 202154397 | G/C | 0.040 <sup>¶</sup> | 0.103              | NA               | NA      | 1.15 (1.10–1.20) | 2.5E-09 | NA      |
| <i>DNASE1L3-ABHD6-PXK</i> | rs73081554      | 3  | 58302935  | T/C | 0.000 <sup>¶</sup> | 0.072              | NA               | NA      | 1.18 (1.11–1.25) | 4.7E-08 | NA      |
| <i>IL20RB</i>             | rs9826828       | 3  | 136402060 | A/G | 0.000 <sup>¶</sup> | 0.020              | NA               | NA      | 1.44 (1.28–1.61) | 8.7E-10 | NA      |
| <i>CD5</i>                | rs508970        | 11 | 60906450  | A/G | 0.000 <sup>¶</sup> | 0.493              | NA               | NA      | 1.07 (1.04–1.10) | 2.7E-06 | NA      |
| <i>FADS1-FADS2-FADS3</i>  | rs968567        | 11 | 61595564  | C/T | 1.000 <sup>¶</sup> | 0.833              | NA               | NA      | 1.12 (1.08–1.17) | 1.8E-08 | NA      |
| <i>ATM</i>                | chr11:107967350 | 11 | 107967350 | A/G | NA                 | 0.923              | NA               | NA      | 1.21 (1.13–1.29) | 1.1E-08 | NA      |
| <i>TYK2</i>               | rs34536443      | 19 | 10463118  | G/C | 1.000 <sup>¶</sup> | 0.956              | NA               | NA      | 1.46 (1.33–1.60) | 4.6E-16 | NA      |
| <i>ILF3</i>               | chr19:10771941  | 19 | 10771941  | C/T | NA                 | 0.973              | NA               | NA      | 1.47 (1.30–1.67) | 8.8E-10 | NA      |
| <b>Novel variants</b>     |                 |    |           |     |                    |                    |                  |         |                  |         |         |
| <i>SLAMF6</i>             | rs148363003     | 1  | 160443973 | T/C | 0.980              | 1.000 <sup>¶</sup> | 0.62 (0.53–0.72) | 5.1E-10 | NA               | NA      | NA      |
| <i>CXCL13</i>             | rs117605225     | 4  | 78508197  | T/G | 0.955              | 1.000 <sup>¶</sup> | 1.54 (1.34–1.77) | 1.9E-09 | NA               | NA      | NA      |
| <i>SWAP70</i>             | rs360136        | 11 | 9773517   | A/C | 0.423              | 0.586 <sup>¶</sup> | 1.17 (1.11–1.23) | 4.5E-10 | 1.06 (1.02–1.10) | 3.2E-03 | 2.0E-03 |
| <i>NFKBIA</i>             | rs111597524     | 14 | 35861800  | T/C | 0.274              | 0.045 <sup>¶</sup> | 1.18 (1.12–1.24) | 5.3E-09 | 0.97 (0.89–1.04) | 3.7E-01 | 6.4E-05 |
| <i>ZFP36L1</i>            | rs194757        | 14 | 69213851  | A/G | 0.338              | 0.327 <sup>¶</sup> | 0.86 (0.82–0.91) | 2.4E-08 | 0.95 (0.92–0.98) | 1.4E-03 | 1.6E-03 |
| <i>LINC00158</i>          | rs1547233       | 21 | 26769507  | T/C | 0.292              | 0.137 <sup>¶</sup> | 1.17 (1.11–1.24) | 6.4E-09 | 1.02 (0.96–1.07) | 5.7E-01 | 3.6E-04 |

The lead SNPs in non-MHC 100 RA loci and their European association statistics in previous trans-ancestral RA GWAS by Okada *et al* (*Nature*. 2014;506(7488):376-81) were retrieved.

\*based on hg19

†Proxy variants in LD with lead variants ( $r^2 > 0.8$  in the 1KGP Europeans). Proxy variants were listed when lead variants were absent in the Korean study.

‡Frequencies, odds ratios, and confidence intervals for effect alleles

§P values for cross-cohort association heterogeneity ( $P_{Het}$ ) were calculated by Cochran's Q tests.

¶Effect allele frequency was retrieved from the 1KGP phase 3 data of East Asians or Europeans (<https://www.ncbi.nlm.nih.gov/snp/>).

Chr, chromosome; Pos, Position; EA, effect allele; NEA, non-effect allele; KOR, Korean; EUR, European; OR, odds ratio; CI, confidence interval; NA, not available.



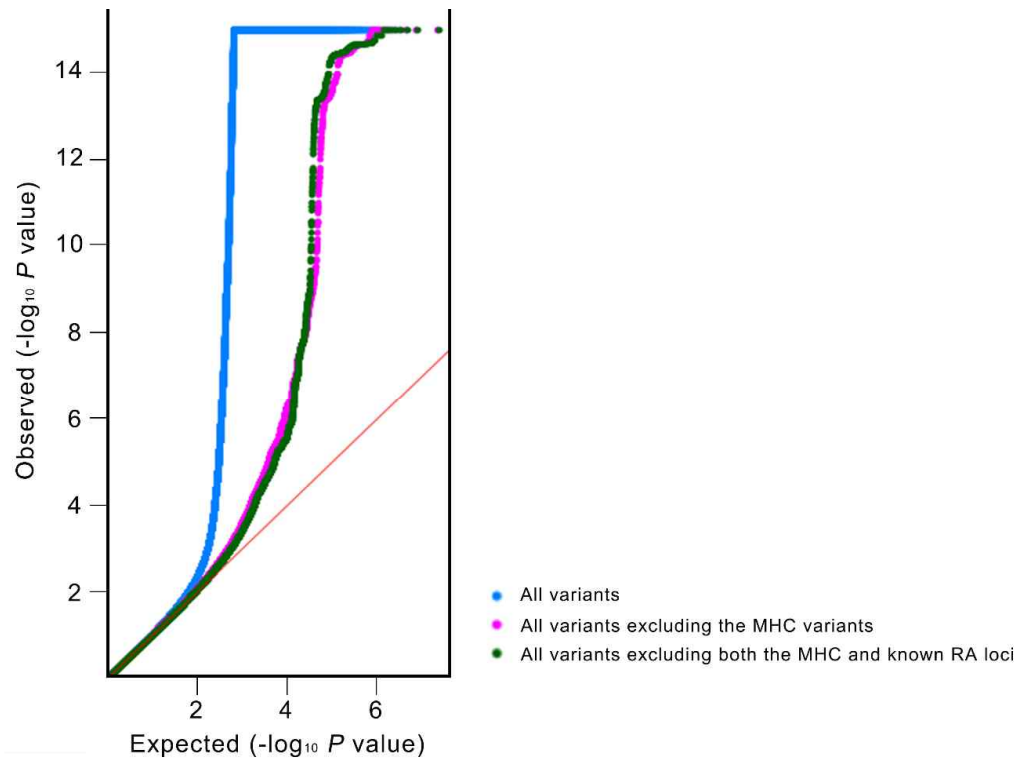

**Supplementary Figure 1 | Quantile-quantile plot for a meta-analysis result.** Quantile-quantile plots were generated using the RA association  $P_{\text{meta}}$  values for all variants (blue), all variants excluding the MHC variants (magenta), and all variants excluding both the MHC and known non-MHC RA loci (green) in a meta-analysis.

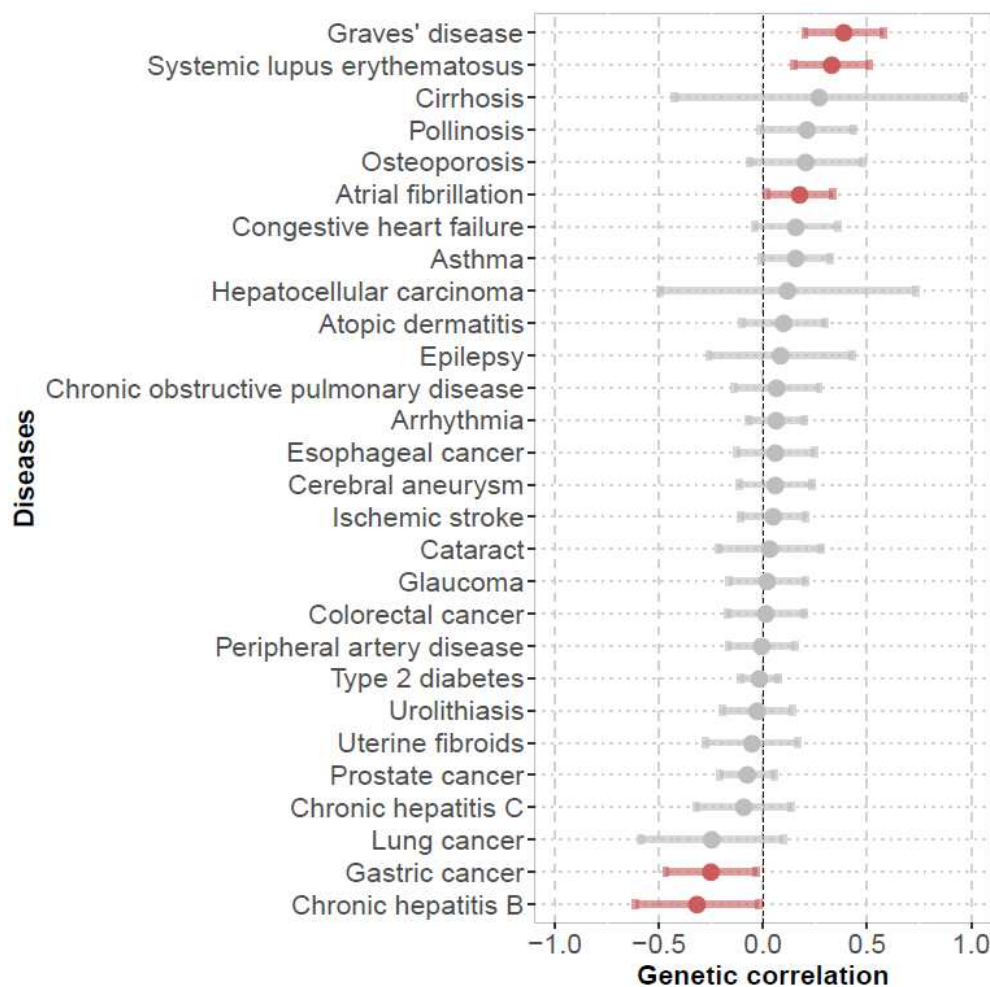

**Supplementary Figure 2 | Genetic correlations between RA and other 28 traits.** Genome-wide associations in RA have a positive correlation with those in three disease including Graves' disease, systemic lupus erythematosus, and atrial fibrillation, while a negative correlation was found with chronic hepatitis B infection and gastric cancer. Data points indicate the correlation coefficient  $r$  and error bars represent the 95% confidence intervals.

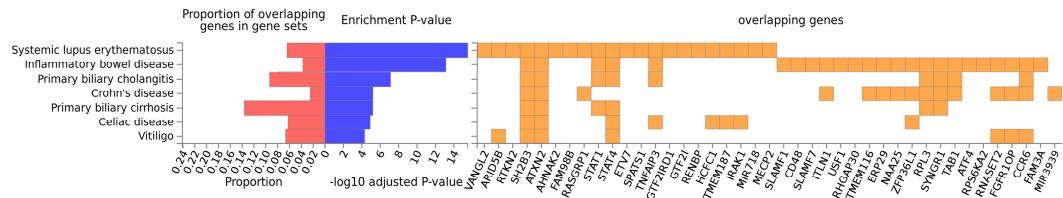

**Supplementary Figure 3 | Significant co-occurrence of the prioritized RA-relevant genes in the susceptibility loci of other diseases.** The prioritized RA-relevant genes were significantly more in the susceptibility loci of seven diseases at the false discovery rate threshold of 5% in one-sided Fisher's exact tests.

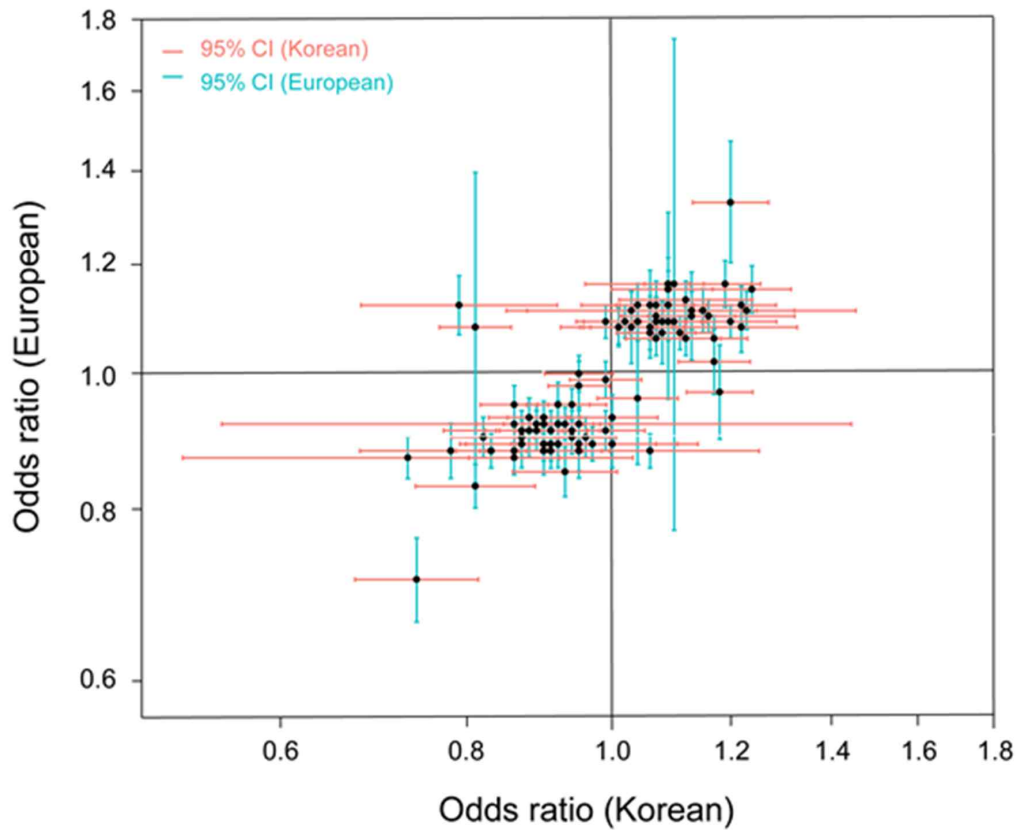

**Supplementary Figure 4 | Odds ratios of RA variants in Korean and European populations.** Odds ratios of 91 RA variants listed in [Supplementary Table 3](#) were available in both Korean and European populations. Odds ratios (black dots) of the RA variants were plotted in the logarithmic axis. The error bars represent 95% confidence intervals in Koreans (green) and Europeans (red). A correlation coefficient for odds ratios in two population was estimated to be 0.76.
